# Supplementary material for: Comparison of Fruit Texture and Storage Quality of Four Apple Varieties
Source: MDPI journal article supplement (doi:10.3390/foods13101563), 2024-05-17
Supplement: s1 [file s1]

**Table S1.** The primers used for qRT-PCR

| Primer name                       | Forward primer            | Reverse primer        |
|-----------------------------------|---------------------------|-----------------------|
| <i>MdPL1</i>                      | GTGCGGATCTTGCTACGAGATTAGG | GCTGTTGGATTGCCAGTTTT  |
| <i>MdPL22</i>                     | GGTGCGGATCTTGCTACGAG      | GCTGTTGGATTGCCAGTTTT  |
| <i>MdPG</i>                       | CGGCTAGTGGCAGTTTGGA       | CGTGGAAGATTGCTTGAGGG  |
| <i>MdXTH</i>                      | GGCCAATGTGGGTTTATGGT      | CCTGTACTGCTGTCGGGTCA  |
| <i>MdACO1</i>                     | TTCCTGTTCCCTCCTGATTCTT    | CATGGTTCACAGCTCAAAG   |
| <i>MdACS1</i>                     | AAATCCGAGGGAACAAAGTG      | ATCAAATCCTGGGTAGTATGG |
| <i>Md <math>\beta</math>-gal1</i> | TCCTTGGCAGTCATTCATCG      | TTCCCGTATTCAAACCCTTC  |
| <i>Md <math>\beta</math>-gal2</i> | ACTCGGAAGTAATCAAGAGGC     | TCTCCAATGACCCATACACG  |
| <i>MdEXP</i>                      | TACCAGCAAGGGAAGAAAGA      | TCAGAGGAACAACCCAAGTC  |
